# Supplementary material
Source: HighWire-hosted journal article supplement (https://diabetes.diabetesjournals.org/content/suppl/2006/08/29/55.9.2419)

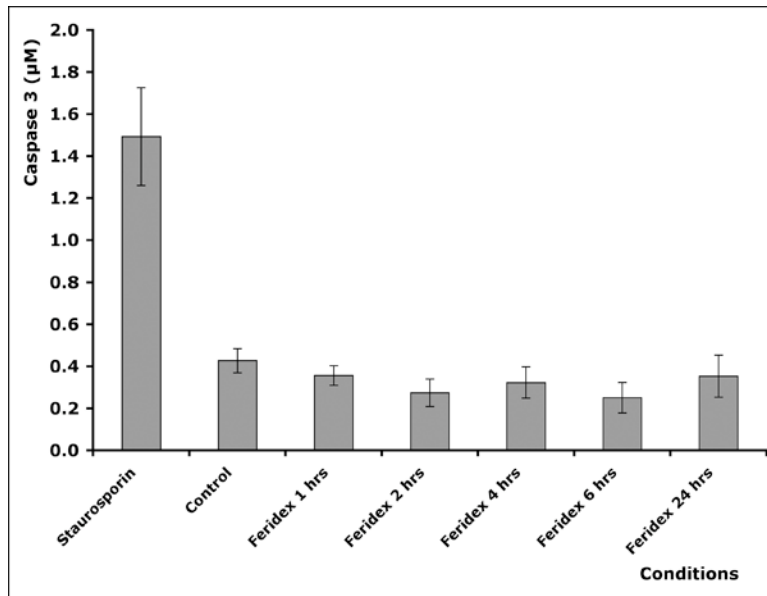

Supplement: PG2419onlineappendixnew.pdf [file PG2419onlineappendixnew.pdf]
